# Supplementary material for: Polymorphisms in leucine-rich repeat genes are associated with autism spectrum disorder susceptibility in populations of European ancestry
Source: Mol Autism. 2010 Mar 25;1:7. doi: 10.1186/2040-2392-1-7 (PMC2913944; doi:10.1186/2040-2392-1-7)
Supplement: Additional file 1 — TDT results for the single nucleotide polymorphisms genotyped across LRRTM1, LRRN1, LRRN3 and LRRTM3 genes in the singleton families of the International Molecular Genetic Study of Autism Consortium population. [file 2040-2392-1-7-S1.XLS]

## Sheet: Sheet1
	Gene ID	SNP ID	Allele	F	TR	NT	OR	(95% CI)	P-value
	LRRTM1	rs2290170	A	-	-	-	-	-	-
	LRRTM1	rs35054232	T	-	-	-	-	-	-
	LRRTM1	rs6733871	C	0.11	11	10	1.1	(0.46,2.59)	0.841
	LRRN1	rs17037086	A	0.934	6	5	1.2	(0.36,3.93)	0.782
	LRRN1	rs2588359	A	0.924	6	7	0.857	(0.28,2.55)	0.782
	LRRN1	rs11919614	A	0.118	7	11	0.636	(0.24,1.64)	0.346
	LRRN1	rs11918898	A	0.869	11	7	1.571	(0.60,4.05)	0.346
	LRRN1	rs998655	C	0.732	18	23	0.783	(0.42,1.45)	0.398
	LRRN1	rs1488454	C	0.083	23	7	3.286	(1.40,7.65)	0.002
	LRRN1	rs10780025	A	0.827	12	13	0.923	(0.42,2.02)	0.847
	LRRN1	rs12634230	A	-	-	-	-	-	-
	LRRN1	rs17037210	A	0.119	7	11	0.636	(0.24,1.64)	0.346
	LRRN1	rs1561802	C	0.789	15	22	0.682	(0.35,1.31)	0.209
	LRRN1	rs12054065	A	0.856	11	12	0.917	(0.40,2.07)	0.841
	LRRN1	rs711580	T	0.881	8	11	0.727	(0.29,1.80)	0.491
	LRRN1	rs13321784	A	-	-	-	-	-	-
	LRRN1	rs711579	T	0.079	9	8	1.125	(0.43,2.91)	0.796
	LRRN1	rs10510278	A	0.065	6	7	0.857	(0.28,2.55)	0.739
	LRRN1	rs696489	G	0.781	14	12	1.167	(0.53,2.52)	0.655
	LRRN1	rs13083087	G	0.8	11	16	0.688	(0.31,1.48)	0.317
	LRRN1	rs13100776	G	0.889	9	9	1	(0.39,2.51)	1
	LRRN1	rs17037482	C	0.972	3	4	0.75	(0.16,3.35)	0.655
	LRRN1	rs9844909	A	0.736	20	19	1.053	(0.56,1.97)	0.866
	LRRN1	rs7648844	C	0.925	7	0	-	-	0.008
	LRRN3	rs2301733	C	0.593	21	31	0.677	(0.38,1.17)	0.174
	LRRN3	rs214890	T	0.111	13	12	1.083	(0.49,2.37)	0.847
	LRRN3	rs10261004	G	0.17	21	13	1.615	(0.80,3.22)	0.182
	LRRN3	rs214884	G	0.075	12	8	1.5	(0.61,3.66)	0.394
	LRRN3	rs9942557	A	0.935	7	1	7	(0.86,56.89)	0.058
	LRRN3	rs214865	G	0.009	1	1	1	(0.06,15.98)	1
	LRRTM3	rs1925577	G	0.391	30	30	1	(0.60,1.65)	1
	LRRTM3	rs12264562	A	0.991	1	3	0.333	(0.03,3.20)	0.317
	LRRTM3	rs10822946	A	0.607	24	24	1	(0.56,1.76)	1
	LRRTM3	rs6480242	A	0.511	43	46	0.935	(0.61,1.41)	0.18
	LRRTM3	rs7901288	C	0.732	16	22	0.727	(0.38,1.38)	0.343
	LRRTM3	rs10997457	C	0.225	20	24	0.833	(0.46,1.50)	0.537
	LRRTM3	rs12240613	C	0.066	5	7	0.714	(0.22,2.25)	0.593
	LRRTM3	rs10997462	A	0.464	22	25	0.88	(0.49,1.56)	0.647
	LRRTM3	rs1998753	G	0.948	5	2	2.5	(0.48.12.88)	0.257
	LRRTM3	rs942788	G	0.825	16	14	1.143	(0.55,2.34)	0.724
	LRRTM3	rs16923867	C	0.035	6	3	2	(0.50,7.99)	0.317
	LRRTM3	rs11597951	A	0.99	1	1	1	(0.06,15.98)	1
	LRRTM3	rs6480245	A	0.696	22	19	1.158	(0.62,2.13)	0.647
	LRRTM3	rs12254553	C	0.987	1	1	1	(0.06,15.98)	1
	LRRTM3	rs12266823	A	0.227	2	10	0.2	(0.04,0.91)	0.021
	LRRTM3	rs10997471	C	-	-	-	-	-	-
	LRRTM3	rs716546	G	0.427	26	27	0.963	(0.56,1.65)	0.895
	LRRTM3	rs716547	G	0.722	19	22	0.864	(0.46,1.59)	0.662
	LRRTM3	rs9971243	C	0.103	7	10	0.7	(0.26,1.83)	0.405
	LRRTM3	rs10997476	A	0.478	23	28	0.821	(0.47,1.42)	0.492
	LRRTM3	rs9633546	C	0.748	22	16	1.375	(0.72,2.61)	0.303
	LRRTM3	rs17279006	A	0.969	3	3	1	(0.20,4.95)	1
	LRRTM3	rs10997479	A	0.01	1	1	1	(0.06,15.98)	1
	LRRTM3	rs1925613	A	0.565	22	32	0.688	(0.39,1.18)	0.197
	LRRTM3	rs10997482	A	0.351	22	24	0.917	(0.51,1.63)	0.782
	LRRTM3	rs7900716	C	0.189	10	17	0.588	(0.26,1.28)	0.162
	LRRTM3	rs12098475	C	-	-	-	-	-	-
	LRRTM3	rs10509278	A	0.088	9	8	1.125	(0.43,2.91)	0.819
	LRRTM3	rs17195324	C	0.944	5	4	1.25	(0.33,4.65)	0.739
	LRRTM3	rs1925594	G	0.077	6	4	1.5	(0.42,5.31)	0.414
	LRRTM3	rs2619652	C	0.59	21	12	1.75	(0.86,3.55)	0.106
	LRRTM3	rs1925624	G	0.533	23	28	0.821	(0.47,1.42)	0.5
	LRRTM3	rs10762135	A	0.673	27	27	1	(0.58,1.70)	1
	LRRTM3	rs10740268	C	0.056	7	4	1.75	(0.51,5.97)	0.317
	LRRTM3	rs12785206	C	0.325	9	18	0.5	(0.22,1.11)	0.106
	LRRTM3	rs10762138	G	0.595	13	13	1	(0.46,2.15)	1
	Abbreviations: CI, confidence interval; F, frequency; NT, non-transmitted; OR, odds ratio; SNP, single nucleotide polymorphism;
	TDT, transmission disequilibrium test; TR, transmitted. Significant results are shown in bold.
