# Supplementary material for: Polymorphisms in leucine-rich repeat genes are associated with autism spectrum disorder susceptibility in populations of European ancestry
Source: Mol Autism. 2010 Mar 25;1:7. doi: 10.1186/2040-2392-1-7 (PMC2913944; doi:10.1186/2040-2392-1-7)
Supplement: Additional file 2 — TDT results for the single nucleotide polymorphisms genotyped across LRRTM1, LRRN1, LRRN3 and LRRTM3 genes in the Northern Dutch population. [file 2040-2392-1-7-S2.XLS]

## Sheet: Sheet1
	Gene ID	SNP ID	Allele	F	TR	NT	OR	(95% CI)	P-value
	LRRTM1	rs2290170	A	-	-	-	-	-	-
	LRRTM1	rs35054232	T	1	0	2	-	-	0.157
	LRRTM1	rs6733871	C	0.184	18	20	0.9	(0.47,1.70)	0.758
	LRRN1	rs17037086	A	0.943	7	8	0.875	(0.31,2.41)	0.796
	LRRN1	rs2588359	A	0.972	3	7	0.429	(0.11,1.65)	0.206
	LRRN1	rs11919614	A	0.035	10	5	2	(0.68,5.85)	0.197
	LRRN1	rs11918898	A	0.974	2	7	0.286	(0.05,1.37)	0.096
	LRRN1	rs998655	C	0.818	22	35	0.629	(0.36,1.07)	0.08
	LRRN1	rs1488454	C	0.145	27	18	1.5	(0.82,2.72)	0.18
	LRRN1	rs10780025	A	0.912	10	21	0.476	(0.22,1.01)	0.048
	LRRN1	rs12634230	A	1	0	2	-	-	0.157
	LRRN1	rs17037210	A	0.024	9	3	3	(0.81,11.08)	0.083
	LRRN1	rs1561802	C	0.861	16	29	0.552	(0.29,1.01)	0.042
	LRRN1	rs12054065	A	0.963	5	17	0.294	(0.10,0.79)	0.011
	LRRN1	rs711580	T	0.959	6	14	0.429	(0.16,1.11)	0.088
	LRRN1	rs13321784	A	-	-	-	-	-	-
	LRRN1	rs711579	T	0.09	9	13	0.692	(0.29,1.61)	0.371
	LRRN1	rs10510278	A	0.059	11	9	1.222	(0.50,2.94)	0.637
	LRRN1	rs696489	G	0.779	23	27	0.852	(0.48,1.48)	0.564
	LRRN1	rs13083087	G	0.763	27	30	0.9	(0.53,1.51)	0.701
	LRRN1	rs13100776	G	0.861	17	15	1.133	(0.56,2.26)	0.724
	LRRN1	rs17037482	C	0.98	3	2	1.5	(0.25,8.97)	0.655
	LRRN1	rs9844909	A	0.808	23	36	0.639	(0.37,1.07)	0.107
	LRRN1	rs7648844	C	0.957	7	6	1.167	(0.39,3.47)	0.808
	LRRN3	rs2301733	C	0.592	24	20	1.2	(0.66,2.17)	0.527
	LRRN3	rs214890	T	0.12	7	16	0.438	(0.17,1.06)	0.039
	LRRN3	rs10261004	G	0.216	12	32	0.375	(0.19,0.72)	0.001
	LRRN3	rs214884	G	0.105	6	18	0.333	(0.13,0.83)	0.019
	LRRN3	rs9942557	A	0.95	7	6	1.167	(0.39,3.47)	0.796
	LRRN3	rs214865	G	0.031	3	5	0.6	(0.14,2.51)	0.527
	LRRTM3	rs1925577	G	0.422	32	34	0.941	(0.58,1.52)	0.819
	LRRTM3	rs12264562	A	0.976	4	4	1	(0.25,3.99)	1
	LRRTM3	rs10822946	A	0.533	39	38	1.026	(0.65,1.60)	0.9
	LRRTM3	rs6480242	A	0.46	70	74	0.946	(0.68,1.31)	0.48
	LRRTM3	rs7901288	C	0.781	18	29	0.621	(0.34,1.11)	0.109
	LRRTM3	rs10997457	C	0.255	23	29	0.793	(0.45,1.37)	0.376
	LRRTM3	rs12240613	C	0.064	5	10	0.5	(0.17,1.46)	0.166
	LRRTM3	rs10997462	A	0.488	39	41	0.951	(0.61,1.47)	0.811
	LRRTM3	rs1998753	G	0.844	12	15	0.8	(0.37,1.70)	0.612
	LRRTM3	rs942788	G	0.838	21	17	1.235	(0.65,2.34)	0.516
	LRRTM3	rs16923867	C	0.036	1	4	0.25	(0.02,2.23)	0.18
	LRRTM3	rs11597951	A	0.986	2	0	-	-	0.157
	LRRTM3	rs6480245	A	0.627	26	27	0.963	(0.56,1.65)	0.895
	LRRTM3	rs12254553	C	0.985	2	3	0.667	(0.11,3.98)	0.655
	LRRTM3	rs12266823	A	0.061	3	5	0.6	(0.14,2.51)	0.48
	LRRTM3	rs10997471	C	-	-	-	-	-	-
	LRRTM3	rs716546	G	0.391	34	34	1	(0.62,1.60)	1
	LRRTM3	rs716547	G	0.727	30	31	0.968	(0.58,1.59)	0.9
	LRRTM3	rs9971243	C	0.087	11	13	0.846	(0.37,1.88)	0.695
	LRRTM3	rs10997476	A	0.416	33	41	0.805	(0.50,1.27)	0.352
	LRRTM3	rs9633546	C	0.83	25	27	0.926	(0.53,1.59)	0.796
	LRRTM3	rs17279006	A	0.97	1	6	0.167	(0.02,1.38)	0.059
	LRRTM3	rs10997479	A	0.012	1	2	0.5	(0.04,5.51)	0.564
	LRRTM3	rs1925613	A	0.526	34	36	0.944	(0.59,1.50)	0.819
	LRRTM3	rs10997482	A	0.429	34	38	0.895	(0.56,1.42)	0.617
	LRRTM3	rs7900716	C	0.121	16	17	0.941	(0.47,1.86)	0.853
	LRRTM3	rs12098475	C	-	-	-	-	-	-
	LRRTM3	rs10509278	A	0.076	11	12	0.917	(0.40,2.07)	0.841
	LRRTM3	rs17195324	C	0.958	7	4	1.75	(0.51,5.97)	0.366
	LRRTM3	rs1925594	G	0.088	14	13	1.077	(0.50,2.29)	0.827
	LRRTM3	rs2619652	C	0.584	36	29	1.241	(0.76,2.02)	0.345
	LRRTM3	rs1925624	G	0.557	25	31	0.806	(0.47,1.36)	0.396
	LRRTM3	rs10762135	A	0.735	28	33	0.848	(0.51,1.40)	0.529
	LRRTM3	rs10740268	C	0.081	14	12	1.167	(0.53,2.52)	0.655
	LRRTM3	rs12785206	C	0.25	11	17	0.647	(0.30,1.38)	0.257
	LRRTM3	rs10762138	G	0.506	41	34	1.206	(0.76,1.89)	0.425
	Abbreviations: CI, confidence interval; F, frequency; NT, non-transmitted; OR, odds ratio; SNP, single nucleotide polymorphism;
	TDT, transmission disequilibrium test; TR, transmitted. Significant results are shown in bold.
