# Supplementary material for: Polymorphisms in leucine-rich repeat genes are associated with autism spectrum disorder susceptibility in populations of European ancestry
Source: Mol Autism. 2010 Mar 25;1:7. doi: 10.1186/2040-2392-1-7 (PMC2913944; doi:10.1186/2040-2392-1-7)
Supplement: Additional file 3 — TDT results for the single nucleotide polymorphisms genotyped across LRRTM1, LRRN1, LRRN3 and LRRTM3 genes in the multiplex families of the International Molecular Genetic Study of Autism Consortium population. [file 2040-2392-1-7-S3.XLS]

## Sheet: Sheet1
	Gene ID	SNP ID	Allele	F	TR	NT	OR	(95% CI)	P-value
	LRRTM1	rs2290170	A	-	-	-	-	-	-
	LRRTM1	rs35054232	T	0.992	5	5	1	(0.28,3.45)	1
	LRRTM1	rs6733871	C	0.162	80	84	0.952	(0.70,1.29)	0.762
	LRRN1	rs17037086	A	0.939	36	48	0.75	(0.48,1.15)	0.211
	LRRN1	rs2588359	A	0.933	42	38	1.105	(0.71,1.71)	0.659
	LRRN1	rs11919614	A	0.067	46	42	1.095	(0.72,1.66)	0.673
	LRRN1	rs11918898	A	0.93	37	49	0.755	(0.49,1.15)	0.19
	LRRN1	rs998655	C	0.754	129	120	1.075	(0.83,1.37)	0.552
	LRRN1	rs1488454	C	0.159	101	106	0.953	(0.72,1.25)	0.729
	LRRN1	rs10780025	A	0.834	92	82	1.122	(0.83, 1.51)	0.451
	LRRN1	rs12634230	A	0.994	4	0	-	-	0.046
	LRRN1	rs17037210	A	0.061	44	37	1.189	(0.76,1.84)	0.453
	LRRN1	rs1561802	C	0.822	103	115	0.896	(0.68,1.16)	0.401
	LRRN1	rs12054065	A	0.907	58	67	0.866	(0.60,1.23)	0.421
	LRRN1	rs711580	T	0.906	57	49	1.163	(0.79,1.70)	0.454
	LRRN1	rs13321784	A	0.999	1	1	1	(0.06, 15.98)	1
	LRRN1	rs711579	T	0.074	52	47	1.106	(0.74,1.64)	0.615
	LRRN1	rs10510278	A	0.048	32	28	1.143	(0.68,1.89)	0.606
	LRRN1	rs696489	G	0.776	111	90	1.233	(0.93,1.62)	0.154
	LRRN1	rs13083087	G	0.757	134	109	1.229	(0.95,1.58)	0.116
	LRRN1	rs13100776	G	0.868	82	65	1.262	(0.91,1.74)	0.158
	LRRN1	rs17037482	C	0.987	9	14	0.643	(0.27,1.48)	0.297
	LRRN1	rs9844909	A	0.778	124	116	1.069	(0.82,1.37)	0.611
	LRRN1	rs7648844	C	0.943	36	39	0.923	(0.58,1.45)	0.742
	LRRN3	rs2301733	C	0.589	150	160	0.938	(0.75,1.17)	0.582
	LRRN3	rs214890	T	0.122	62	74	0.838	(0.59,1.17)	0.269
	LRRN3	rs10261004	G	0.215	106	110	0.964	(0.73,1.25)	0.787
	LRRN3	rs214884	G	0.098	56	60	0.933	(0.64,1.34)	0.717
	LRRN3	rs9942557	A	0.96	21	27	0.778	(0.43,1.37)	0.396
	LRRN3	rs214865	G	0.032	16	19	0.842	(0.43,1.63)	0.602
	LRRTM3	rs1925577	G	0.43	153	164	0.933	(0.74,1.16)	0.564
	LRRTM3	rs12264562	A	0.979	13	13	1	(0.46,2.15)	1
	LRRTM3	rs10822946	A	0.574	174	154	1.13	(0.90,1.40)	0.333
	LRRTM3	rs6480242	A	0.484	317	320	0.991	(0.84,1.15)	0.696
	LRRTM3	rs7901288	C	0.702	141	150	0.94	(0.74,1.18)	0.62
	LRRTM3	rs10997457	C	0.184	107	99	1.081	(0.82,1.42)	0.581
	LRRTM3	rs12240613	C	0.063	46	36	1.278	(0.82,1.97)	0.264
	LRRTM3	rs10997462	A	0.49	159	168	0.946	(0.76,1.17)	0.651
	LRRTM3	rs1998753	G	0.937	33	11	3	(1.51,5.93)	0.001
	LRRTM3	rs942788	G	0.882	69	70	0.986	(0.70,1.37)	0.935
	LRRTM3	rs16923867	C	0.058	34	27	1.259	(0.75,2.08)	0.37
	LRRTM3	rs11597951	A	0.978	15	10	1.5	(0.67,3.33)	0.435
	LRRTM3	rs6480245	A	0.676	123	122	1.008	(0.78,1.29)	0.948
	LRRTM3	rs12254553	C	0.987	8	11	0.727	(0.29,1.80)	0.491
	LRRTM3	rs12266823	A	0.14	30	63	0.476	(0.30,0.73)	0.001
	LRRTM3	rs10997471	C	0.993	5	6	0.833	(0.25,2.73)	0.763
	LRRTM3	rs716546	G	0.435	152	161	0.944	(0.75,1.17)	0.626
	LRRTM3	rs716547	G	0.704	161	132	1.22	(0.96,1.53)	0.126
	LRRTM3	rs9971243	C	0.091	43	54	0.796	(0.53,1.18)	0.259
	LRRTM3	rs10997476	A	0.407	186	141	1.319	(1.05,1.64)	0.012
	LRRTM3	rs9633546	C	0.809	96	104	0.923	(0.69,1.21)	0.544
	LRRTM3	rs17279006	A	0.943	27	18	1.5	(0.82,2.72)	0.17
	LRRTM3	rs10997479	A	0.017	12	10	1.2	(0.51,2.77)	0.683
	LRRTM3	rs1925613	A	0.569	193	172	1.122	(0.91,1.37)	0.26
	LRRTM3	rs10997482	A	0.433	190	170	1.118	(0.90,1.37)	0.293
	LRRTM3	rs7900716	C	0.148	72	84	0.857	(0.62,1.17)	0.324
	LRRTM3	rs12098475	C	-	-	-	-	-	-
	LRRTM3	rs10509278	A	0.072	43	46	0.935	(0.61,1.41)	0.75
	LRRTM3	rs17195324	C	0.959	27	26	1.038	(0.60,1.77)	0.889
	LRRTM3	rs1925594	G	0.083	35	41	0.854	(0.54,1.34)	0.502
	LRRTM3	rs2619652	C	0.555	119	139	0.856	(0.67,1.09)	0.21
	LRRTM3	rs1925624	G	0.533	187	149	1.255	(1.01,1.55)	0.031
	LRRTM3	rs10762135	A	0.71	156	129	1.209	(0.95,1.52)	0.105
	LRRTM3	rs10740268	C	0.07	35	39	0.897	(0.56,1.41)	0.659
	LRRTM3	rs12785206	C	0.338	124	131	0.947	(0.74,1.21)	0.664
	LRRTM3	rs10762138	G	0.5	101	99	1.02	(0.77,1.34)	0.885
	Abbreviations: CI, confidence interval; F, frequency; NT, non-transmitted; OR, odds ratio; SNP, single nucleotide polymorphism;
	TDT, transmission disequilibrium test; TR, transmitted. Significant results are shown in bold.
