# Supplementary material for: Polymorphisms in leucine-rich repeat genes are associated with autism spectrum disorder susceptibility in populations of European ancestry
Source: Mol Autism. 2010 Mar 25;1:7. doi: 10.1186/2040-2392-1-7 (PMC2913944; doi:10.1186/2040-2392-1-7)
Supplement: Additional file 4 — TDT results for the single nucleotide polymorphisms genotyped across LRRTM1, LRRN1, LRRN3 and LRRTM3 genes in the Italian population. [file 2040-2392-1-7-S4.XLS]

## Sheet: Sheet1
	Gene ID	SNP ID	Allele	F	TR	NT	OR	(95% CI)	P-value
	LRRTM1	rs2290170	A	-	-	-	-	-	-
	LRRTM1	rs35054232	T	-	-	-	-	-	-
	LRRTM1	rs6733871	C	0.156	13	18	0.722	(0.35,1.47)	0.336
	LRRN1	rs17037086	A	0.865	16	13	1.231	(0.59,2.55)	0.59
	LRRN1	rs2588359	A	0.91	14	9	1.556	(0.67,3.59)	0.297
	LRRN1	rs11919614	A	0.091	10	11	0.909	(0.38,2.14)	0.835
	LRRN1	rs11918898	A	0.893	11	11	1	(0.43,2.30)	1
	LRRN1	rs998655	C	0.72	27	33	0.818	(0.49,1.36)	0.48
	LRRN1	rs1488454	C	0.186	29	24	1.208	(0.70,2.07)	0.484
	LRRN1	rs10780025	A	0.778	24	23	1.043	(0.58,1.84)	0.886
	LRRN1	rs12634230	A	0.98	3	2	1.5	(0.25,8.97)	0.655
	LRRN1	rs17037210	A	0.089	9	11	0.818	(0.33,1.97)	0.637
	LRRN1	rs1561802	C	0.756	26	26	1	(0.58,1.72)	1
	LRRN1	rs12054065	A	0.86	17	15	1.133	(0.56,2.26)	0.724
	LRRN1	rs711580	T	0.854	16	10	1.6	(0.72,3.52)	0.239
	LRRN1	rs13321784	A	-	-	-	-	-	-
	LRRN1	rs711579	T	0.084	14	12	1.167	(0.53,2.52)	0.705
	LRRN1	rs10510278	A	0.052	9	7	1.286	(0.47,3.45)	0.617
	LRRN1	rs696489	G	0.834	20	26	0.769	(0.42,1.37)	0.405
	LRRN1	rs13083087	G	0.799	22	34	0.647	(0.37,1.10)	0.134
	LRRN1	rs13100776	G	0.931	10	13	0.769	(0.33,1.75)	0.513
	LRRN1	rs17037482	C	0.987	2	1	2	(0.18,22.05)	0.564
	LRRN1	rs9844909	A	0.703	34	32	1.063	(0.65,1.72)	0.799
	LRRN1	rs7648844	C	0.961	6	6	1	(0.32,3.10)	1
	LRRN3	rs2301733	C	0.584	37	43	0.86	(0.55,1.33)	0.46
	LRRN3	rs214890	T	0.138	18	18	1	(0.52,1.92)	1
	LRRN3	rs10261004	G	0.213	25	27	0.926	(0.53,1.59)	0.785
	LRRN3	rs214884	G	0.123	17	16	1.063	(0.53,2.10)	0.866
	LRRN3	rs9942557	A	0.89	17	8	2.125	(0.91,4.92)	0.072
	LRRN3	rs214865	G	0.019	3	3	1	(0.20,4.95)	1
	LRRTM3	rs1925577	G	0.49	35	31	1.129	(0.69,1.83)	0.606
	LRRTM3	rs12264562	A	0.994	1	2	0.5	(0.04,5.51)	0.564
	LRRTM3	rs10822946	A	0.635	40	42	0.952	(0.61,1.46)	0.837
	LRRTM3	rs6480242	A	0.473	72	71	1.014	(0.73,1.40)	0.796
	LRRTM3	rs7901288	C	0.656	38	25	1.52	(0.91,2.51)	0.133
	LRRTM3	rs10997457	C	0.221	28	28	1	(0.59,1.68)	1
	LRRTM3	rs12240613	C	0.065	15	10	1.5	(0.67,3.33)	0.317
	LRRTM3	rs10997462	A	0.442	46	42	1.095	(0.72,1.66)	0.67
	LRRTM3	rs1998753	G	0.967	4	3	1.333	(0.29,5.95)	0.705
	LRRTM3	rs942788	G	0.859	21	22	0.955	(0.52,1.73)	0.866
	LRRTM3	rs16923867	C	0.046	15	7	2.143	(0.87,5.25)	0.088
	LRRTM3	rs11597951	A	0.987	2	1	2	(0.18,22.05)	0.564
	LRRTM3	rs6480245	A	0.66	33	30	1.1	(0.67,1.80)	0.722
	LRRTM3	rs12254553	C	0.973	4	4	1	(0.25,3.99)	1
	LRRTM3	rs12266823	A	0.061	10	8	1.25	(0.49,3.16)	0.67
	LRRTM3	rs10997471	C	-	-	-	-	-	-
	LRRTM3	rs716546	G	0.297	43	26	1.654	(1.01,2.69)	0.017
	LRRTM3	rs716547	G	0.852	19	25	0.76	(0.41,1.38)	0.289
	LRRTM3	rs9971243	C	0.079	12	10	1.2	(0.51,2.77)	0.695
	LRRTM3	rs10997476	A	0.456	37	31	1.194	(0.74,1.92)	0.446
	LRRTM3	rs9633546	C	0.766	25	21	1.19	(0.66,2.12)	0.579
	LRRTM3	rs17279006	A	0.908	13	7	1.857	(0.74,4.65)	0.221
	LRRTM3	rs10997479	A	0.006	1	1	1	(0.06,15.98)	1
	LRRTM3	rs1925613	A	0.716	27	37	0.73	(0.44,1.19)	0.218
	LRRTM3	rs10997482	A	0.564	30	45	0.667	(0.42,1.05)	0.091
	LRRTM3	rs7900716	C	0.156	23	19	1.211	(0.65,2.22)	0.572
	LRRTM3	rs12098475	C	-	-	-	-	-	-
	LRRTM3	rs10509278	A	0.058	7	8	0.875	(0.31,2.41)	0.808
	LRRTM3	rs17195324	C	0.981	2	2	1	(0.14,7.09)	1
	LRRTM3	rs1925594	G	0.096	18	12	1.5	(0.72,3.11)	0.289
	LRRTM3	rs2619652	C	0.493	35	29	1.207	(0.73,1.97)	0.485
	LRRTM3	rs1925624	G	0.623	39	37	1.054	(0.67,1.65)	0.814
	LRRTM3	rs10762135	A	0.84	18	29	0.621	(0.34,1.11)	0.071
	LRRTM3	rs10740268	C	0.072	16	10	1.6	(0.72,3.52)	0.273
	LRRTM3	rs12785206	C	0.364	26	26	1	(0.58,1.72)	1
	LRRTM3	rs10762138	G	0.45	30	32	0.938	(0.56,1.54)	0.796
	Abbreviations: CI, confidence interval; F, frequency; NT, non-transmitted; OR, odds ratio; SNP, single nucleotide polymorphism;
	TDT, transmission disequilibrium test; TR, transmitted. Significant results are shown in bold.
