# Supplementary material for: Polymorphisms in leucine-rich repeat genes are associated with autism spectrum disorder susceptibility in populations of European ancestry
Source: Mol Autism. 2010 Mar 25;1:7. doi: 10.1186/2040-2392-1-7 (PMC2913944; doi:10.1186/2040-2392-1-7)
Supplement: Additional file 5 — TDT results for the single nucleotide polymorphisms genotyped across LRRTM1, LRRN1, LRRN3 and LRRTM3 genes in the German population. [file 2040-2392-1-7-S5.XLS]

## Sheet: Sheet1
	Gene ID	SNP ID	Allele	F	TR	NT	OR	(95% CI)	P-value
	LRRTM1	rs2290170	A	-	-	-	-	-	-
	LRRTM1	rs35054232	T	-	-	-	-	-	-
	LRRTM1	rs6733871	C	0.288	10	14	0.714	(0.31,1.60)	0.414
	LRRN1	rs17037086	A	0.883	7	2	3.5	(0.72,16.84)	0.096
	LRRN1	rs2588359	A	0.917	4	5	0.8	(0.21,2.97)	0.705
	LRRN1	rs11919614	A	0.083	3	5	0.6	(0.14,2.51)	0.48
	LRRN1	rs11918898	A	0.943	3	3	1	(0.20,4.95)	1
	LRRN1	rs998655	C	0.7	15	9	1.667	(0.72,3.80)	0.273
	LRRN1	rs1488454	C	0.167	5	8	0.625	(0.20,1.91)	0.439
	LRRN1	rs10780025	A	0.8	8	7	1.143	(0.41,3.15)	0.763
	LRRN1	rs12634230	A	0.958	2	0	-	-	0.157
	LRRN1	rs17037210	A	0.057	2	3	0.667	(0.11,3.98)	0.655
	LRRN1	rs1561802	C	0.792	10	5	2	(0.68,5.85)	0.297
	LRRN1	rs12054065	A	0.925	4	4	1	(0.25,3.99)	1
	LRRN1	rs711580	T	0.883	7	5	1.4	(0.44,4.41)	0.593
	LRRN1	rs13321784	A	-	-	-	-	-	-
	LRRN1	rs711579	T	0.121	2	7	0.286	(0.05,1.37)	0.132
	LRRN1	rs10510278	A	0.103	2	6	0.333	(0.06,1.65)	0.206
	LRRN1	rs696489	G	0.796	8	8	1	(0.37,2.66)	1
	LRRN1	rs13083087	G	0.772	10	12	0.833	(0.36,1.92)	0.705
	LRRN1	rs13100776	G	0.889	4	7	0.571	(0.16,1.95)	0.405
	LRRN1	rs17037482	C	0.958	2	0	-	-	0.157
	LRRN1	rs9844909	A	0.732	12	9	1.333	(0.56,3.16)	0.467
	LRRN1	rs7648844	C	0.944	3	4	0.75	(0.16,3.35)	0.655
	LRRN3	rs2301733	C	0.612	11	10	1.1	(0.46,2.59)	0.841
	LRRN3	rs214890	T	0.137	7	6	1.167	(0.39,3.47)	0.782
	LRRN3	rs10261004	G	0.155	6	8	0.75	(0.26,2.16)	0.564
	LRRN3	rs214884	G	0.05	3	3	1	(0.20,4.95)	1
	LRRN3	rs9942557	A	-	-	-	-	-	-
	LRRN3	rs214865	G	-	-	-	-	-	-
	LRRTM3	rs1925577	G	0.5	8	13	0.615	(0.25,1.48)	0.275
	LRRTM3	rs12264562	A	1	0	4	-	-	0.046
	LRRTM3	rs10822946	A	0.479	18	10	1.8	(0.83,3.89)	0.206
	LRRTM3	rs6480242	A	0.365	25	19	1.316	(0.72,2.38)	0.083
	LRRTM3	rs7901288	C	0.788	4	11	0.364	(0.11,1.14)	0.108
	LRRTM3	rs10997457	C	0.2	6	8	0.75	(0.26.2.16)	0.637
	LRRTM3	rs12240613	C	0.052	8	3	2.667	(0.70,10.05)	0.166
	LRRTM3	rs10997462	A	0.577	10	16	0.625	(0.28,1.37)	0.289
	LRRTM3	rs1998753	G	0.938	3	2	1.5	(0.25,8.97)	0.705
	LRRTM3	rs942788	G	0.898	5	4	1.25	(0.33,4.65)	0.763
	LRRTM3	rs16923867	C	0.02	6	1	6	(0.72,49.83)	0.059
	LRRTM3	rs11597951	A	0.98	1	1	1	(0.06,15.98)	1
	LRRTM3	rs6480245	A	0.623	15	9	1.667	(0.72,3.80)	0.239
	LRRTM3	rs12254553	C	0.981	1	1	1	(0.06,15.98)	1
	LRRTM3	rs12266823	A	0.074	4	3	1.333	(0.29,5.95)	0.739
	LRRTM3	rs10997471	C	-	-	-	-	-	-
	LRRTM3	rs716546	G	0.415	16	16	1	(0.50,1.99)	1
	LRRTM3	rs716547	G	0.646	15	6	2.5	(0.96,6.44)	0.083
	LRRTM3	rs9971243	C	0.038	5	2	2.5	(0.48,12.88)	0.317
	LRRTM3	rs10997476	A	0.31	14	7	2	(0.80,4.95)	0.127
	LRRTM3	rs9633546	C	0.778	7	9	0.778	(0.28,2.08)	0.593
	LRRTM3	rs17279006	A	0.944	2	5	0.4	(0.07,2.06)	0.18
	LRRTM3	rs10997479	A	-	-	-	-	-	-
	LRRTM3	rs1925613	A	0.511	13	7	1.857	(0.74,4.65)	0.221
	LRRTM3	rs10997482	A	0.433	16	16	1	(0.50,1.99)	1
	LRRTM3	rs7900716	C	0.143	6	5	1.2	(0.36,3.93)	0.705
	LRRTM3	rs12098475	C	-	-	-	-	-	-
	LRRTM3	rs10509278	A	0.074	5	4	1.25	(0.33,4.65)	0.705
	LRRTM3	rs17195324	C	0.967	2	0	-	-	0.157
	LRRTM3	rs1925594	G	0.104	6	3	2	(0.50,7.99)	0.317
	LRRTM3	rs2619652	C	0.642	12	11	1.091	(0.48,2.47)	0.857
	LRRTM3	rs1925624	G	0.478	15	6	2.5	(0.96,6.44)	0.083
	LRRTM3	rs10762135	A	0.691	14	9	1.556	(0.67,3.59)	0.336
	LRRTM3	rs10740268	C	0.077	4	3	1.333	(0.29,5.95)	0.705
	LRRTM3	rs12785206	C	0.234	10	8	1.25	(0.49,3.16)	0.67
	LRRTM3	rs10762138	G	0.592	7	11	0.636	(0.24,1.64	0.414
	Abbreviations: CI, confidence interval; F, frequency; NT, non-transmitted; OR, odds ratio; SNP, single nucleotide polymorphism;
	TDT, transmission disequilibrium test; TR, transmitted. Significant results are shown in bold.
