# Supplementary material for: Polymorphisms in leucine-rich repeat genes are associated with autism spectrum disorder susceptibility in populations of European ancestry
Source: Mol Autism. 2010 Mar 25;1:7. doi: 10.1186/2040-2392-1-7 (PMC2913944; doi:10.1186/2040-2392-1-7)
Supplement: Additional file 6 — TDT Meta-analysis results for the single nucleotide polymorphisms genotyped across LRRTM1, LRRN1, LRRN3 and LRRTM3 genes. [file 2040-2392-1-7-S6.XLS]

## Sheet: Sheet1
	Gene ID	SNP ID	Allele	F	TR	NT	OR	(95% CI)	P-value
	LRRTM1	rs2290170	A	-	-	-	-	-	-
	LRRTM1	rs35054232	T	0.996	5	10	0.5	(0.17,1.46)	0.197
	LRRTM1	rs6733871	C	0.165	132	146	0.905	(0.71,1.15)	0.405
	LRRN1	rs17037086	A	0.926	72	76	0.933	(0.67,1.29)	0.678
	LRRN1	rs2588359	A	0.933	69	66	1.051	(0.75,1.48)	0.775
	LRRN1	rs11919614	A	0.071	76	74	1.025	(0.74,1.42)	0.88
	LRRN1	rs11918898	A	0.924	64	77	0.839	(0.60,1.18)	0.308
	LRRN1	rs998655	C	0.754	211	220	0.96	(0.79,1.16	0.672
	LRRN1	rs1488454	C	0.154	185	163	1.116	(0.90,1.38)	0.31
	LRRN1	rs10780025	A	0.834	146	146	1.006	(0.80,1.27)	0.957
	LRRN1	rs12634230	A	0.992	9	5	1.8	(0.60, 5.37)	0.285
	LRRN1	rs17037210	A	0.065	71	65	1.081	(0.77,1.52)	0.657
	LRRN1	rs1561802	C	0.814	170	197	0.863	(0.70,1.06)	0.163
	LRRN1	rs12054065	A	0.904	95	115	0.842	(0.64,1.11)	0.221
	LRRN1	rs711580	T	0.903	94	89	1.066	(0.79,1.43)	0.671
	LRRN1	rs13321784	A	0.997	3	1	3	(0.31, 28.84)	0.317
	LRRN1	rs711579	T	0.081	86	87	1.002	(0.74,1.35)	0.989
	LRRN1	rs10510278	A	0.054	60	57	1.066	(0.74,1.54)	0.732
	LRRN1	rs696489	G	0.786	176	163	1.08	(0.87,1.34)	0.48
	LRRN1	rs13083087	G	0.768	204	201	1.017	(0.84,1.24)	0.868
	LRRN1	rs13100776	G	0.878	122	109	1.121	(0.86,1.45)	0.388
	LRRN1	rs17037482	C	0.983	19	21	0.905	(0.49,1.68)	0.746
	LRRN1	rs9844909	A	0.766	213	212	1.007	(0.83,1.22)	0.947
	LRRN1	rs7648844	C	0.946	59	55	1.073	(0.74,1.55)	0.719
	LRRN3	rs2301733	C	0.59	243	264	0.921	(0.77,1.09)	0.355
	LRRN3	rs214890	T	0.124	107	126	0.854	(0.66,1.11)	0.234
	LRRN3	rs10261004	G	0.207	170	190	0.905	(0.73,1.12)	0.352
	LRRN3	rs214884	G	0.098	94	105	0.91	(0.69,1.21)	0.516
	LRRN3	rs9942557	A	0.947	52	42	1.169	(0.76,1.79)	0.47
	LRRN3	rs214865	G	0.026	23	28	0.823	(0.47,1.43)	0.489
	LRRTM3	rs1925577	G	0.436	258	272	0.949	(0.80,1.13)	0.548
	LRRTM3	rs12264562	A	0.983	19	26	0.731	(0.40,1.32)	0.317
	LRRTM3	rs10822946	A	0.576	295	268	1.099	(0.93,1.30)	0.262
	LRRTM3	rs6480242	A	0.476	527	530	0.994	(0.88,1.12)	0.925
	LRRTM3	rs7901288	C	0.714	217	237	0.919	(0.76,1.11)	0.373
	LRRTM3	rs10997457	C	0.203	184	188	0.979	(0.80,1.20)	0.839
	LRRTM3	rs12240613	C	0.063	79	66	1.197	(0.86,1.67)	0.29
	LRRTM3	rs10997462	A	0.485	276	292	0.946	(0.80,1.12)	0.507
	LRRTM3	rs1998753	G	0.934	57	33	1.669	(1.07, 2.61)	0.025
	LRRTM3	rs942788	G	0.868	132	127	1.039	(0.81,1.33)	0.758
	LRRTM3	rs16923867	C	0.049	62	42	1.462	(0.98,2.19)	0.066
	LRRTM3	rs11597951	A	0.981	21	13	1.615	(0.81, 3.23)	0.258
	LRRTM3	rs6480245	A	0.667	219	207	1.057	(0.87,1.28)	0.569
	LRRTM3	rs12254553	C	0.984	16	20	0.801	(0.41,1.55)	0.509
	LRRTM3	rs12266823	A	0.118	49	89	0.563	(0.39,0.81)	0.002
	LRRTM3	rs10997471	C	0.996	5	6	0.833	(0.25,2.73)	0.763
	LRRTM3	rs716546	G	0.408	271	264	1.024	(0.86,1.21)	0.784
	LRRTM3	rs716547	G	0.726	244	216	1.126	(0.94,1.35)	0.208
	LRRTM3	rs9971243	C	0.087	78	89	0.872	(0.64,1.18)	0.38
	LRRTM3	rs10997476	A	0.417	293	248	1.18	(0.99, 1.40)	0.056
	LRRTM3	rs9633546	C	0.799	175	177	0.988	(0.80,1.22)	0.911
	LRRTM3	rs17279006	A	0.944	46	39	1.255	(0.80,1.96)	0.32
	LRRTM3	rs10997479	A	0.013	15	14	1.078	(0.52,2.25)	0.842
	LRRTM3	rs1925613	A	0.581	289	284	1.018	(0.86,1.20)	0.834
	LRRTM3	rs10997482	A	0.442	292	293	0.998	(0.85,1.17)	0.979
	LRRTM3	rs7900716	C	0.149	127	142	0.896	(0.70,1.14)	0.368
	LRRTM3	rs12098475	C	-	-	-	-	-	-
	LRRTM3	rs10509278	A	0.072	75	78	0.961	(0.70,1.32)	0.808
	LRRTM3	rs17195324	C	0.961	43	36	1.194	(0.77,1.86)	0.425
	LRRTM3	rs1925594	G	0.086	79	73	1.078	(0.78,1.49)	0.647
	LRRTM3	rs2619652	C	0.559	223	220	1.012	(0.84,1.22)	0.903
	LRRTM3	rs1925624	G	0.546	289	251	1.148	(0.97,1.36)	0.112
	LRRTM3	rs10762135	A	0.726	243	227	1.072	(0.89,1.29)	0.454
	LRRTM3	rs10740268	C	0.071	76	68	1.114	(0.80,1.55)	0.521
	LRRTM3	rs12785206	C	0.327	180	200	0.903	(0.74,1.11)	0.323
	LRRTM3	rs10762138	G	0.508	192	189	1.016	(0.83,1.24)	0.874
	Abbreviations: CI, confidence interval; F, frequency; NT, non-transmitted; OR, odds ratio; SNP, single nucleotide polymorphism;
	TDT, transmission disequilibrium test; TR, transmitted. Significant results are shown in bold.
